# Supplementary material for: Cofactor-assisted three-way DNA junction-driven strand displacement
Source: Royal Society of Chemistry journal article supplement (doi:10.1039/d1ra05242j), 2021-01-01
Supplement: d1ra05242j1.pdf [file d1ra05242j1.pdf]

## Supporting Information

### Cofactor-assisted three-way junction-driven strand displacement

Yufeng Jia,<sup>a</sup> and Yingxin Hu <sup>\*b</sup>

<sup>a</sup> School of Economics and Management, Shijiazhuang Tiedao University Shijiazhuang, 050043, Hebei, China

<sup>b</sup> College of Information Science and Technology, Shijiazhuang Tiedao University Shijiazhuang, 050043, Hebei, China

E-mail: huyingxin@mail.stdu.edu.cn

## Table of Contents

|                                                                                        |   |
|----------------------------------------------------------------------------------------|---|
| S1: DNA sequences .....                                                                | 3 |
| S2: ATP-assisted three-way DNA junction-driven strand displacement .....               | 3 |
| S3: Hg <sup>2+</sup> -assisted three-way DNA junction-driven strand displacement ..... | 5 |
| S4: pH-assisted three-way DNA junction-driven strand displacement .....                | 6 |

## S1: DNA sequences

Table S1. Sequences of the Oligonucleotides (5' to 3')

| Name  | Sequence (5'→3')                                     | Length (n.t.) |
|-------|------------------------------------------------------|---------------|
| HM    | FAM-CATATTCCTCATTCAATACCCTACG                        | 26            |
| HA    | GGGCCTGATTGAGGTATTGAATGAGGGAATATG-BHQ                | 33            |
| HI1   | GCTTGTCGTAGTCAATCAGGCC                               | 23            |
| HI3   | CATATTCCTCATTCAATACCCTACGTCTAGC                      | 32            |
| AM    | FAM-AACTAATCCTCAGATCCAGCTAGTGTC-BHQ                  | 27            |
| AA    | ATTAGGCCGAATCTAGCTGGATCTGAGGATTAGT                   | 34            |
| AI1   | CGCTATATACCTGGGGGAGTATGACACATTCCG<br>CCTAAT          | 39            |
| AI3   | ACTAATCCTCAGATCCAGCTAGTGTCTGCGGAG<br>GAAGGTATAT      | 43            |
| AI3-N | ACTAATCCTCAGATCCAGCTAGTGTCAAGCGGAG<br>GAAGGTATAT     | 43            |
| PM    | AACTAATCCTCAGATCCAGCTAGTGTC                          | 27            |
| PA    | AGTCAGATTACGATATCGGCACGCGC                           | 36            |
| PI1   | TCTCCAATTCTACCCCTAACCCCTGACACATTCCG<br>GCCTAAT       | 41            |
| PI3   | ACTAATCCTCAGATCCAGCTAGTGTCTCCCCTAA<br>CCCCTAGAATTGGA | 48            |

## S2: ATP-assisted three-way junction-driven strand displacement

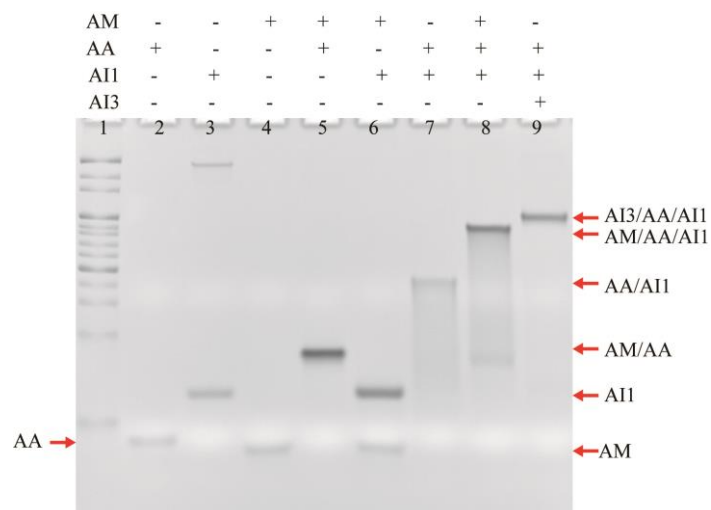

**Figure S1.** Native 15% polyacrylamide gel analysis of the formation of the three-way junction structure. DNA strands added in every lane are indicated above the image. The concentration of each DNA strand in PAGE was 2 $\mu$ M.

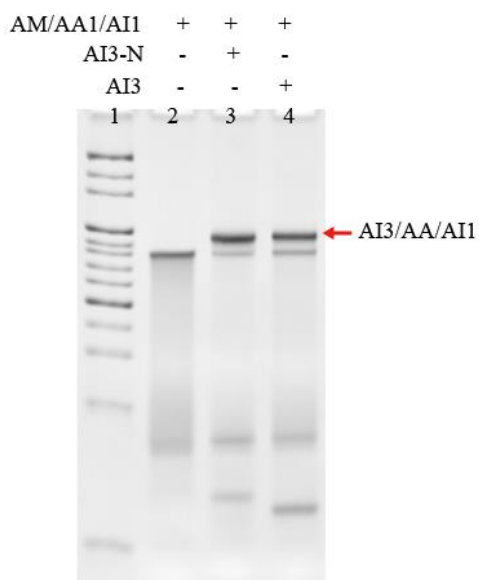

**Figure S2.** Native 15% polyacrylamide gel analysis of the strand displacement reaction with different inputs. DNA strands added in every lane are indicated in the table. Concentrations for each DNA strand in PAGE are all 2 $\mu$ M.

### S3: Hg<sup>2+</sup>-assisted three-way junction-driven strand displacement

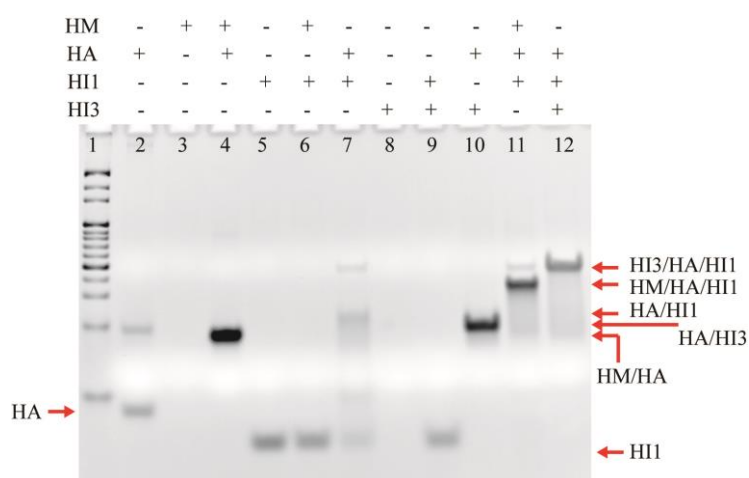

**Figure S3.** Native 15% polyacrylamide gel analysis of the formation of the three-way junction structure. DNA strands added in every lane are indicated above the image. The concentration of each DNA strand in PAGE was 2 $\mu$ M.

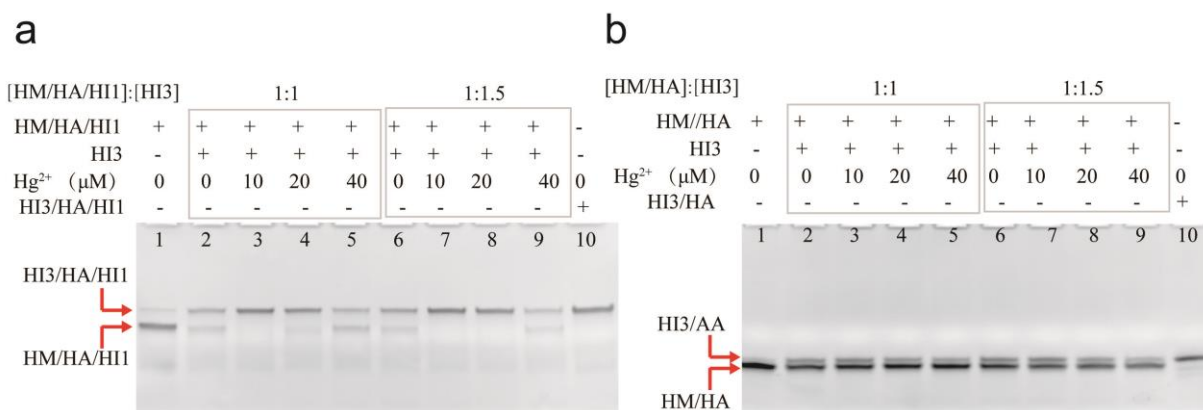

**Figure S4. (a).** Native 15% polyacrylamide gel analysis of **Hg<sup>2+</sup>-assisted three-way junction-driven strand displacement at 25°C for 20 hours**. DNA strands added in every lane are indicated above the image. The concentration of three-way complex HM/HA/HI1 in each lane was 2 $\mu$ M. The concentration of HI3 in lane 2-5 was 2 $\mu$ M and in lane 6-9 was 3 $\mu$ M. **(b).** Native 15% polyacrylamide analysis of **strand displacement without HI1 at 25°C for 20 hours**. DNA strands added in every lane are indicated above the image. The concentration of DNA complex HM/HA in each lane was 2 $\mu$ M. The concentration of HI3 in lane 2-5 was 2 $\mu$ M and in lane 6-9 was 3 $\mu$ M.

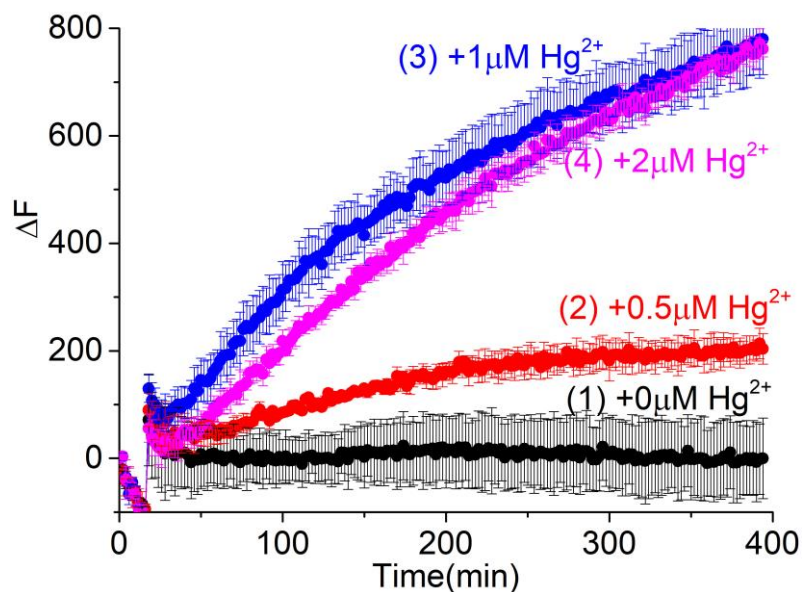

**Figure S5.** Fluorescence intensity analysis of the complex **HM/HA/HI1** upon addition of H13 and different concentrations of  $\text{Hg}^{2+}$ . **Curve 1: 0 $\mu\text{M}$ ; Curve 2: 0.5 $\mu\text{M}$ ; Curve 3: 1 $\mu\text{M}$ ; Curve 4: 2 $\mu\text{M}$ .**  $[\text{HM/HA/HI1}] = 100\text{nM}$ ,  $[\text{HI3}] = 150\text{nM}$ .

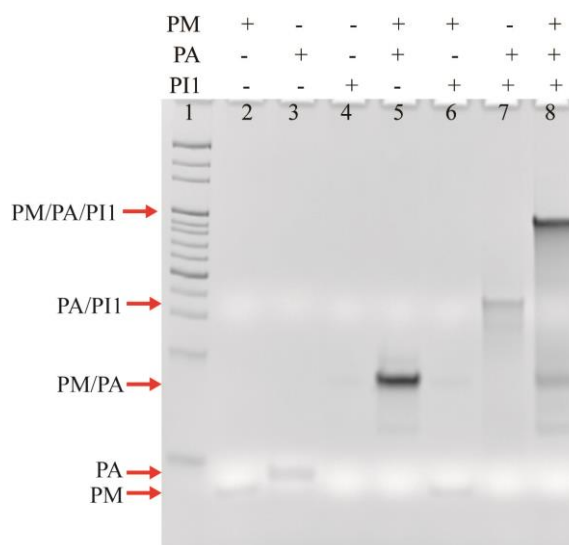

**Figure S6.** Native 15% polyacrylamide gel analysis of the formation of the three-way junction structure in **pH=7.5**. DNA strands added in every lane are indicated above the image. The concentration of each DNA strand in PAGE was  $2\mu\text{M}$ .

#### **S4: pH-assisted three-way junction-driven strand displacement**

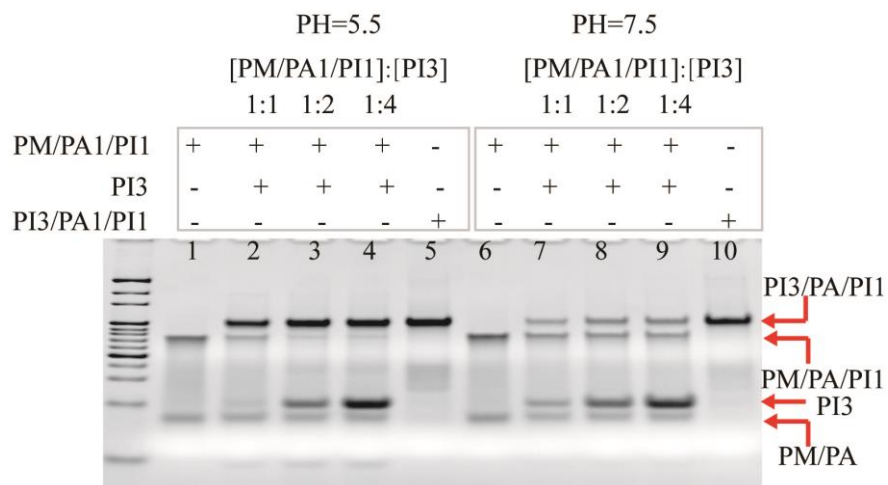

**Figure S7.** Native 15% polyacrylamide comparison of strand displacement reaction at 25°C for **half an hour, pH=5.5 and pH=7.5 respectively**. DNA strands added in every lane are indicated above the image. The concentration of DNA complex in each lane was 2 $\mu$ M. The concentration of PI3 was 2 $\mu$ M, 4 $\mu$ M and 8 $\mu$ M respectively.
